# Supplementary material
Source: PubMed Central journal article supplement (PMC8007675)
Supplement: NIHMS1632663-supplement-1.pdf [file NIHMS1632663-supplement-1.pdf]

**Supplementary Table 1.** Food group components used to derive each cluster

| <b>Category used in cluster analysis</b> | <b>Items from Nutrition Data System for Research (NDSR) included in category</b>                                                                                                                                                                                                                                                                                                            |
|------------------------------------------|---------------------------------------------------------------------------------------------------------------------------------------------------------------------------------------------------------------------------------------------------------------------------------------------------------------------------------------------------------------------------------------------|
| Fruits                                   | Citrus fruit, avocado and similar, fruit excluding citrus fruit                                                                                                                                                                                                                                                                                                                             |
| Vegetables                               | Dark-green vegetables, deep-yellow vegetables, tomato, vegetable juice, other vegetables                                                                                                                                                                                                                                                                                                    |
| Starchy vegetables                       | White potatoes, other starchy vegetables                                                                                                                                                                                                                                                                                                                                                    |
| Legumes                                  | Legumes                                                                                                                                                                                                                                                                                                                                                                                     |
| Whole grains                             | Whole grain varieties of grains, flour and dry mixed; loaf-type bread and plain rolls; other breads (quick breads, corn muffins, tortillas); pasta, ready-to-eat cereal (not presweetened and presweetened); baby food grain mixtures                                                                                                                                                       |
| Meat/dairy alternatives                  | Milk-nondairy, meat alternatives, cheese-nondairy, yogurt-nondairy, nondairy-based (sweetened, artificially sweetened, or unsweetened) meal replacement/supplement                                                                                                                                                                                                                          |
| Cheese/yogurt                            | Cheese (whole, reduced fat, low fat and fat free), yogurt (sweetened or artificially sweetened whole, low fat, and fat free)                                                                                                                                                                                                                                                                |
| Milk                                     | Milk (whole, reduced fat, and low fat and fat free)                                                                                                                                                                                                                                                                                                                                         |
| Eggs                                     | Eggs, egg substitute                                                                                                                                                                                                                                                                                                                                                                        |
| Nuts                                     | Nuts and seeds, nuts and seed butters                                                                                                                                                                                                                                                                                                                                                       |
| Seafood                                  | Fish-fresh and smoked, lean fish-fresh and smoked, shellfish                                                                                                                                                                                                                                                                                                                                |
| Poultry                                  | Poultry, lean poultry                                                                                                                                                                                                                                                                                                                                                                       |
| Beef/pork                                | Beef (full fat and lean), veal (full fat and lean), lamb (full fat and lean), fresh pork (full fat and lean), game                                                                                                                                                                                                                                                                          |
| Cold cuts                                | Cold cuts and sausage (full fat and lean), cured pork (full fat and lean), organ meats, baby food meat mixtures                                                                                                                                                                                                                                                                             |
| Artificially and unsweetened beverages   | Artificially and unsweetened coffee, coffee substitutes, soft drinks, and tea; artificially sweetened fruit drinks, water, and milk beverage powder without non-fat dry milk                                                                                                                                                                                                                |
| Fried produce                            | Fried fruit, fried potatoes, fried vegetables                                                                                                                                                                                                                                                                                                                                               |
| Fried meat                               | Fried chicken (commercial entrée and fast food), fried fish (commercial entrée and fast food), fried shellfish (commercial entrée and fast food)                                                                                                                                                                                                                                            |
| Snacks                                   | Fruit-based, vegetable-based, and meat-based savory snack; crackers, snack chips, and snack bars (whole grain, some whole grain, refined grain); popcorn (non-flavored and flavored)                                                                                                                                                                                                        |
| Refined grains                           | Some whole grain and refined grain varieties of grains, flour and dry mixed; loaf-type bread and plain rolls; other breads (quick breads, corn muffins, tortillas); pasta, ready-to-eat cereal (not presweetened and presweetened); baby food grain mixtures + non-grain flour and similar                                                                                                  |
| Desserts                                 | Cakes, cookies, pies, pastries, Danish, doughnuts, and cobblers (whole grain, some whole grain, refined grain); frozen desserts (dairy and non-dairy); pudding and other dairy dessert (sugar and artificially sweetened); candy (non-chocolate and chocolate); frosting or glaze; sweet sauces (regular and reduce fat/reduced calorie/fat free); miscellaneous dessert; baby food dessert |

| <b>Category used in cluster analysis</b> | <b>Items from Nutrition Data System for Research (NDSR) included in category</b>                                                                                                                                                                                                                                                                                                                                                |
|------------------------------------------|---------------------------------------------------------------------------------------------------------------------------------------------------------------------------------------------------------------------------------------------------------------------------------------------------------------------------------------------------------------------------------------------------------------------------------|
| Miscellaneous                            | Margarine (regular and reduced fat); oil, shortening; butter and other animal fats (regular and reduced fat); sugar; syrup, honey, jam, jelly, preserves; sugar substitute; cream (full, reduced fat, low fat and fat free, non-dairy); salad dressing (regular and reduced fat/reduced calorie/fat free); gravy (regular and reduced fat/fat free); sauces and condiments (regular and reduced fat); pickled foods; soup broth |
| Sugar-sweetened beverages                | Sweetened coffee, coffee substitutes, fruit drinks soft drinks, tea, water, and flavored milk beverage powder without non-fat dry milk                                                                                                                                                                                                                                                                                          |
| Fruit juice                              | Citrus juice, fruit juice excluding citrus juice                                                                                                                                                                                                                                                                                                                                                                                |
| Sweetened milk                           | Ready-to drink flavored milk (whole, reduced fat, low fat and fat free), sweetened (sugar or artificially) flavored milk beverage powder with non-fat dry milk                                                                                                                                                                                                                                                                  |

**Supplementary Table 2.** Odds ratios (95% CIs) predicting membership in the Unhealthy compared to Healthy cluster<sup>†</sup>

|                                                          | <b>Prevention studies</b>   |                        |
|----------------------------------------------------------|-----------------------------|------------------------|
|                                                          | <i>NET-Works</i><br>(n=527) | <i>GROW</i><br>(n=604) |
| <b>Child's sex</b>                                       |                             |                        |
| Male                                                     | Ref.                        | Ref.                   |
| Female                                                   | 0.98 (0.68, 1.41)           | 0.71 (0.44, 1.14)      |
| <b>Child's age, years</b>                                | 1.02 (0.77, 1.36)           | 0.83 (0.63, 1.09)      |
| <b>Child's BMI, kg/m<sup>2</sup></b>                     | 0.92 (0.82, 1.03)           | 0.82 (0.59, 1.12)      |
| <b>Highest household education</b>                       | **                          |                        |
| <High school                                             | Ref.                        | Ref.                   |
| High school or GED                                       | 1.90 (1.14, 3.17)*          | 1.32 (0.73, 2.38)      |
| ≥Some higher education                                   | 2.48 (1.57, 3.91)**         | 1.30 (0.72, 2.31)      |
| <b>Primary parent/guardian employment</b>                |                             |                        |
| Not working for pay                                      | Ref.                        | Ref.                   |
| Part time                                                | 0.86 (0.54, 1.36)           | 0.83 (0.45, 1.53)      |
| Full time                                                | 1.19 (0.74, 1.90)           | 1.81 (0.95, 3.42)      |
| <b>SNAP participant</b>                                  |                             |                        |
| No                                                       | Ref.                        | Ref.                   |
| Yes                                                      | 1.33 (0.87, 2.03)           | 1.28 (0.74, 2.20)      |
| <b>Primary parent/guardian marital status</b>            |                             |                        |
| Married/Living as married                                | Ref.                        | Ref.                   |
| Single                                                   | 2.04 (1.35, 3.08)**         | 1.34 (0.74, 2.44)      |
| <b>Primary parent/guardian weight status<sup>‡</sup></b> |                             |                        |
| Underweight/Normal weight                                | Ref.                        | Ref.                   |
| Overweight                                               | 1.16 (0.69, 1.94)           | 0.86 (0.43, 1.72)      |
| Obesity                                                  | 1.38 (0.84, 2.24)           | 1.24 (0.63, 2.43)      |

CIs, confidence intervals; NET-Works, Now Everyone Together for Healthy and Amazing Kids; GROW, Growing Right Onto Wellness; GED, General Equivalency Diploma; SNAP, Supplemental Nutrition Assistance Program, BMI, body mass index

<sup>†</sup>Models adjusted for all variables listed in the table

<sup>‡</sup>Parent's weight status classified as follows: underweight/normal weight (BMI<25 kg/m<sup>2</sup>), overweight (BMI 25-29 kg/m<sup>2</sup>), obesity (BMI≥30 kg/m<sup>2</sup>)

\*p<0.05, \*\*p<0.01

**Supplementary Table 3.** Odds ratios (95% CIs) predicting cluster membership for the Dairy/SSB or Semi-Traditional compared to Healthy cluster in GROW or GOALS, respectively and the Sandwich compared to Mixed cluster in IMPACT<sup>†</sup>

|                                                          | Prevention study         | Treatment studies               |                       |
|----------------------------------------------------------|--------------------------|---------------------------------|-----------------------|
|                                                          | GROW<br>(n=604)          | GOALS<br>(n=240)                | IMPACT<br>(n=341)     |
|                                                          | Dairy/SSB vs.<br>Healthy | Semi-Traditional<br>vs. Healthy | Sandwich vs.<br>Mixed |
| <b>Child's sex</b>                                       |                          |                                 |                       |
| Male                                                     | Ref.                     | Ref.                            | Ref.                  |
| Female                                                   | 0.65 (0.44, 0.97)*       | 0.95 (0.56, 1.64)               | 1.08 (0.69, 1.68)     |
| <b>Child's age, years</b>                                | 0.87 (0.70, 1.09)        | 1.07 (0.88, 1.30)               | 1.07 (0.72, 1.58)     |
| <b>Child's BMI, kg/m<sup>2</sup></b>                     | 1.00 (0.77, 1.28)        | 0.97 (0.90, 1.05)               | 1.05 (1.00, 1.10)*    |
| <b>Highest household education</b>                       |                          |                                 |                       |
| <High school                                             | Ref.                     | Ref.                            | Ref.                  |
| High school or GED                                       | 1.25 (0.78, 2.00)        | 1.22 (0.58, 2.57)               | 0.87 (0.45, 1.70)     |
| ≥Some higher education                                   | 0.81 (0.50, 1.33)        | 1.35 (0.66, 2.78)               | 1.12 (0.60, 2.10)     |
| <b>Primary parent/guardian employment</b>                |                          |                                 |                       |
| Not working for pay                                      | Ref.                     | Ref.                            | Ref.                  |
| Part time                                                | 0.79 (0.48, 1.29)        | 1.61 (0.79, 3.28)               | 1.25 (0.68, 2.30)     |
| Full time                                                | 1.25 (0.71, 2.20)        | 1.40 (0.73, 2.67)               | 1.14 (0.66, 1.98)     |
| <b>SNAP participant</b>                                  |                          |                                 |                       |
| No                                                       | Ref.                     | Ref.                            | Ref.                  |
| Yes                                                      | 1.56 (1.00, 2.43)        | 1.05 (0.59, 1.87)               | 1.22 (0.71, 2.10)     |
| <b>Primary parent/guardian marital status</b>            |                          |                                 |                       |
| Married/Living as married                                | Ref.                     | Ref.                            | Ref.                  |
| Single                                                   | 0.70 (0.41, 1.21)        | 1.60 (0.68, 3.78)               | 0.92 (0.57, 1.49)     |
| <b>Primary parent/guardian weight status<sup>‡</sup></b> |                          |                                 |                       |
| Under-/Normal weight                                     | Ref.                     | Ref.                            | Ref.                  |
| Overweight                                               | 0.67 (0.39, 1.16)        | 1.58 (0.66, 3.80)               | 0.98 (0.41, 2.33)     |
| Obesity                                                  | 0.64 (0.37, 1.10)        | 1.40 (0.60, 3.26)               | 0.85 (0.40, 1.78)     |

CIs, confidence intervals; GROW, Growing Right Onto Wellness; IMPACT, Ideas Moving Parents and Adolescents to Change Together; GED, General Equivalency Diploma; SNAP, Supplemental Nutrition Assistance Program, BMI, body mass index; SSB, sugar-sweetened beverages

<sup>†</sup>Models adjusted for all covariates listed in the table

<sup>‡</sup>Parent's weight status classified as follows: underweight/normal weight (BMI<25 kg/m<sup>2</sup>), overweight (BMI 25-29 kg/m<sup>2</sup>), obesity (BMI≥30 kg/m<sup>2</sup>)

\*p<0.05, \*\*p<0.01
